# Supplementary material
Source: publisher figshare collection journal article supplement (https://acs.figshare.com/ndownloader/files/4029334)
Supplement: Supplementary file 1 [file 4029334]

# Supporting Information

## Benzene hydroxylation and simultaneous extraction of phenol in two membrane contactors made with three-compartment cells

*Raffaele Molinari<sup>1\*</sup>, Pietro Argurio<sup>1</sup>, Teresa Poerio<sup>2</sup>*

<sup>1</sup>Department of Environmental Engineering and Territory and Chemical Engineering, UdR  
INCA, University of Calabria,

Via P. Bucci, cubo 44/A, I-87036 Rende (CS), Italy

Ph. +39 0984 496699; Fax +39 0984 496655; E-mail: [r.molinari@unical.it](mailto:r.molinari@unical.it)

<sup>2</sup>National Research Council - Institute for Membrane Technology (ITM-CNR)

c/o University of Calabria, Via Pietro Bucci, cubo 17C, I-87036 Rende (CS), Italy

13

14

15

16 **Table S1.** Growth rate of phenol in the organic and strip phases and phenol fluxes from feed to  
 17 the organic and from organic to the strip phases vs. time during the catalytic tests with NaCl in  
 18 the LMC (aqueous feed phase: pH 2.8 (0.19 mL acetic acid), 0.095 g iron(II) sulphate, NaCl 0.1  
 19 M; organic phase: benzene; aqueous stripping phase: NaOH 0.1 M; T = 35°C).

| Time<br>(min) | $r_{\text{org}}$<br>$\text{mmol L}^{-1} \text{ h}^{-1}$ | $r_{\text{strip}}$<br>$\text{mmol L}^{-1} \text{ h}^{-1}$ | $J_{\text{f} \rightarrow \text{o}}$<br>$\text{mmol h}^{-1} \text{ m}^{-2}$ | $J_{\text{o} \rightarrow \text{s}}$<br>$\text{mmol h}^{-1} \text{ m}^{-2}$ |
|---------------|---------------------------------------------------------|-----------------------------------------------------------|----------------------------------------------------------------------------|----------------------------------------------------------------------------|
| 0             | 0.0                                                     | 0.0                                                       | 0.00                                                                       | 0.00                                                                       |
| 30            | 12.0                                                    | 0.0                                                       | 7.85                                                                       | 0.00                                                                       |
| 60            | 12.6                                                    | 3.2                                                       | 10.34                                                                      | 2.09                                                                       |
| 90            | 13.4                                                    | 5.6                                                       | 12.43                                                                      | 3.66                                                                       |
| 120           | 13.0                                                    | 8.2                                                       | 13.87                                                                      | 5.37                                                                       |
| 150           | 16.0                                                    | 9.0                                                       | 16.36                                                                      | 5.89                                                                       |
| 180           | 17.0                                                    | 10.0                                                      | 17.67                                                                      | 6.54                                                                       |
| 210           | 18.0                                                    | 12.0                                                      | 19.63                                                                      | 7.85                                                                       |
| 240           | 18.0                                                    | 18.0                                                      | 23.56                                                                      | 11.78                                                                      |

20

21

22

23

24 **Table S2.** Growth rate of phenol in the organic and strip phases and phenol fluxes from feed to

25 the organic and from organic to the strip phases vs. time during the catalytic tests with NaCl in

26 the SMC (aqueous feed phase: pH 2.8 (0.19 mL acetic acid), 0.095 g iron(II) sulphate, NaCl 0.1

27 M; organic phase: benzene; aqueous stripping phase: NaOH 0.1 M; T = 35°C).

| Time<br>(min) | $r_{\text{org}}$<br>$\text{mmol L}^{-1} \text{ h}^{-1}$ | $r_{\text{strip}}$<br>$\text{mmol L}^{-1} \text{ h}^{-1}$ | $J_{\text{f} \rightarrow \text{o}}$<br>$\text{mmol h}^{-1} \text{ m}^{-2}$ | $J_{\text{o} \rightarrow \text{s}}$<br>$\text{mmol h}^{-1} \text{ m}^{-2}$ |
|---------------|---------------------------------------------------------|-----------------------------------------------------------|----------------------------------------------------------------------------|----------------------------------------------------------------------------|
| 0             | 0.0                                                     | 0.0                                                       | 0.00                                                                       | 0.00                                                                       |
| 30            | 30.0                                                    | 3.8                                                       | 16.48                                                                      | 1.83                                                                       |
| 60            | 40.0                                                    | 8.8                                                       | 23.80                                                                      | 4.27                                                                       |
| 90            | 80.0                                                    | 12.5                                                      | 45.16                                                                      | 6.10                                                                       |
| 120           | 110.0                                                   | 20.0                                                      | 63.46                                                                      | 9.76                                                                       |
| 150           | 180.0                                                   | 40.0                                                      | 107.40                                                                     | 19.53                                                                      |
| 180           | 210.0                                                   | 70.0                                                      | 136.69                                                                     | 34.17                                                                      |
| 210           | 167.5                                                   | 75.0                                                      | 118.38                                                                     | 36.61                                                                      |
| 240           | 32.5                                                    | 60.0                                                      | 45.16                                                                      | 29.29                                                                      |

29

30

31

**Table S3.** Growth rate of phenol in the organic and strip phases and phenol fluxes from feed to the organic and from organic to the strip phases vs. time during the catalytic tests with Na<sub>2</sub>SO<sub>4</sub> in the LMC (aqueous feed phase: pH 2.8 (0.19 mL acetic acid), 0.095 g iron(II) sulphate, Na<sub>2</sub>SO<sub>4</sub> 0.1 M; organic phase: benzene; aqueous stripping phase: NaOH 0.1 M; T = 35°C).

| Time<br>(min) | $r_{\text{org}}$<br>mmol L <sup>-1</sup> h <sup>-1</sup> | $r_{\text{strip}}$<br>mmol L <sup>-1</sup> h <sup>-1</sup> | $J_{\text{f} \rightarrow \text{o}}$<br>mmol h <sup>-1</sup> m <sup>-2</sup> | $J_{\text{o} \rightarrow \text{s}}$<br>mmol h <sup>-1</sup> m <sup>-2</sup> |
|---------------|----------------------------------------------------------|------------------------------------------------------------|-----------------------------------------------------------------------------|-----------------------------------------------------------------------------|
| 0             | 0.0                                                      | 0.0                                                        | 0.00                                                                        | 0.00                                                                        |
| 30            | 14.0                                                     | 0.0                                                        | 9.16                                                                        | 0.00                                                                        |
| 60            | 16.0                                                     | 8.0                                                        | 15.70                                                                       | 5.23                                                                        |
| 90            | 18.0                                                     | 8.4                                                        | 17.28                                                                       | 5.50                                                                        |
| 120           | 36.0                                                     | 17.0                                                       | 34.68                                                                       | 11.12                                                                       |
| 150           | 50.0                                                     | 16.6                                                       | 43.58                                                                       | 10.86                                                                       |
| 180           | 42.0                                                     | 20.0                                                       | 40.57                                                                       | 13.09                                                                       |
| 210           | 44.0                                                     | 40.0                                                       | 54.97                                                                       | 26.17                                                                       |
| 240           | 90.0                                                     | 42.0                                                       | 86.38                                                                       | 27.48                                                                       |

36

37

38

39

40 **Table S4.** Growth rate of phenol in the organic and strip phases and phenol fluxes from feed to  
 41 the organic and from organic to the strip phases vs. time during the catalytic tests with Na<sub>2</sub>SO<sub>4</sub> in  
 42 the SMC (aqueous feed phase: pH 2.8 (0.19 mL acetic acid), 0.095 g iron(II) sulphate, Na<sub>2</sub>SO<sub>4</sub>  
 43 0.1 M; organic phase: benzene; aqueous stripping phase: NaOH 0.1 M; T = 35°C).

| Time<br>(min) | $r_{\text{org}}$<br>mmol L <sup>-1</sup> h <sup>-1</sup> | $r_{\text{strip}}$<br>mmol L <sup>-1</sup> h <sup>-1</sup> | $J_{\text{f} \rightarrow \text{o}}$<br>mmol h <sup>-1</sup> m <sup>-2</sup> | $J_{\text{o} \rightarrow \text{s}}$<br>mmol h <sup>-1</sup> m <sup>-2</sup> |
|---------------|----------------------------------------------------------|------------------------------------------------------------|-----------------------------------------------------------------------------|-----------------------------------------------------------------------------|
| 0             | 0.0                                                      | 0.0                                                        | 0.00                                                                        | 0.00                                                                        |
| 30            | 102.5                                                    | 5.0                                                        | 52.48                                                                       | 2.44                                                                        |
| 60            | 420.0                                                    | 60.5                                                       | 234.56                                                                      | 29.53                                                                       |
| 90            | 285.0                                                    | 84.5                                                       | 180.38                                                                      | 41.25                                                                       |
| 120           | 142.5                                                    | 195.0                                                      | 164.76                                                                      | 95.19                                                                       |
| 150           | 215.0                                                    | 200.0                                                      | 202.59                                                                      | 97.63                                                                       |
| 180           | 35.0                                                     | 255.0                                                      | 141.57                                                                      | 124.48                                                                      |
| 210           | 20.0                                                     | 275.0                                                      | 144.01                                                                      | 134.25                                                                      |
| 240           | 20.0                                                     | 277.5                                                      | 145.23                                                                      | 135.47                                                                      |

44
